# Supplementary material for: AI-assisted academic writing in medical postgraduate education: A cross-sectional study of L2 challenges, affective barriers, and instructional implications
Source: Research Square preprint supplement (doi:10.21203/rs.3.rs-7553790/v1), 2025-10-27
Supplement: Supplementary file 1 [file 1e96ee7308a25559f3f3d30e.docx]

**Investigation on the English Writing Ability of Postgraduate Students in Hospitals**

1. What is your gender? [Single-choice question]

| **Options** |  |
| --- | --- |
| A. Male |  |
| B. Female |  |
| C. Others |  |

2. What is your age? years old [Fill-in-the-blank question]

3. Type of Graduate? [Single-choice question]

| **Options** |  |
| --- | --- |
| A. Clinical Graduate Student |  |
| B. Research-oriented Graduate Student |  |

4. Postgraduate stage? [Single-choice question]

| **Options** |  |
| --- | --- |
| Grade 1 master |  |
| Grade 2 master |  |
| Grade 3 master |  |
| Others |  |

5. Current professional field? [Single-choice question]

| **Options** |  |
| --- | --- |
| A.Surgery |  |
| B. Internal medicine |  |
| C. Others (medical technology, nursing, pediatrics, etc.) |  |

6. Your English proficiency [Single-choice question]

| **Options** |  |
| --- | --- |
| A. English Level 6 score below 500 |  |
| B. English Level 6 score of 500 or above (including 500) |  |

7. Have you received any training in English writing? [Multiple-choice question]

| **Options** |  |
| --- | --- |
| A. The academic English writing module in the medical school curriculum |  |
| B. Writing lectures or workshops organized by schools or hospitals |  |
| C. One-on-one guidance from a mentor or senior classmate |  |
| D. Online courses (such as Coursera, MOOCs, etc.) |  |
| E. Self-study (through books, videos, ChatGPT, etc.) |  |
| F. Has not received any training |  |

8. In which parts do you most frequently engage in writing English papers? [Multiple-choice question]

| **Options** |  |
| --- | --- |
| A. Drafting the initial manuscript |  |
| B. Revising the language |  |
| C. Organizing the references |  |
| D. Writing the letter of submission or response |  |
| E. The entire paper was completed by me |  |

9. Which aspect of English writing do you think needs the most improvement? [Multiple-choice question]

| **Options** |  |
| --- | --- |
| A. Introduction |  |
| B. Methods |  |
| C. Results |  |
| D. Discussion |  |
| E. Abstract |  |
| F. Figure/Table legends |  |
| G. Response letter |  |

10. What are your main ways of acquiring knowledge about English writing? [Multiple-choice question]

| **Options** |  |
| --- | --- |
| A. Study expressions by reading English literature. |  |
| B. Consult your advisor or senior classmates. |  |
| C. Use AI tools (such as ChatGPT, DeepL). |  |
| D. Utilize online resources (Zhihu, Bilibili, official accounts, etc.). |  |
| E. Attend offline courses or lectures. |  |

11. How many English papers do you expect to publish during your graduate studies? [Single-choice question]

| **Options** |  |
| --- | --- |
| A. No plan |  |
| B. 1 article |  |
| C. 2-3 articles |  |
| D. 4 articles or more |  |

12. Which factors have the greatest impact on your completion of the English paper? [Multiple-choice question]

| **Options** |  |
| --- | --- |
| A. Inadequate English language proficiency |  |
| B. Lack of writing training and experience |  |
| C. No research data or projects |  |
| D. No supervisor or peer support |  |
| E. No time (due to heavy clinical/research tasks) |  |
| F. Reviewer pressure or fear of failure |  |

13. The most challenging aspects of English writing (ranked by difficulty, 1 = easiest, 5 = most difficult)

| **Options** | 1 | 2 | 3 | 4 | 5 | **Average score** |
| --- | --- | --- | --- | --- | --- | --- |
| Express ideas accurately in English. |  |  |  |  |  |  |
| Construct paragraphs with clear logic |  |  |  |  |  |  |
| Master the appropriate tone and academic style |  |  |  |  |  |  |
| Avoid grammar and spelling errors |  |  |  |  |  |  |
| Correctly cite references |  |  |  |  |  |  |

14. How do you usually feel when facing the revisions from your supervisor? [Multiple Choice Question]

| **Options** |  |
| --- | --- |
| A. I can learn a lot from it. |  |
| B. I feel nervous or frustrated. |  |
| C. I hope to receive more encouragement and support. |  |
| D. The numerous revision suggestions have made me lose confidence. |  |

15. Have you ever used any of the following AI or assistance tools for English writing? [Multiple Choice Question]

| **Options** |  |
| --- | --- |
| A. Chat GPT |  |
| B. Deep Seek |  |
| C.Grammarly |  |
| D.Others |  |

16. At which stage of the writing process do you typically use AI tools? [Multiple Choice Question]

| **Options** |  |
| --- | --- |
| A. Write the initial draft |  |
| B. Revise grammar and expression |  |
| C. Translate the Chinese ideas into English |  |
| D. Generate summary or sentence template |  |
| E. Rewrite or improve language quality |  |
| F. Reply to the reviewers' comments |  |
| G. Use throughout the entire writing process |  |
| H. I do not use AI tools |  |

17. How do you think AI has contributed to your improvement in English writing skills? [Score option 1 = Strongly Disagree, 5 = Strongly Agree]

| **Options** | 1 | 2 | 3 | 4 | 5 | **Average score** |
| --- | --- | --- | --- | --- | --- | --- |
| Helped to generate natural and idiomatic English expressions |  |  |  |  |  |  |
| Improved my writing efficiency |  |  |  |  |  |  |
| Reduced my anxiety about writing |  |  |  |  |  |  |
| Enhanced my awareness of writing quality standards |  |  |  |  |  |  |
| Enabled me to have more confidence in English writing |  |  |  |  |  |  |
| Made me overly dependent, which is not conducive to improving my own abilities |  |  |  |  |  |  |

18. Do you have any concerns about potential issues regarding submission or ethics when using AI writing tools? [Single-choice question]

| **Options** |  |
| --- | --- |
| A. Very worried |  |
| B. Somewhat worried |  |
| C. Not very worried |  |
| D. Completely not worried |  |
| E. Haven't considered it |  |

19 . If there were a course specifically teaching "how to use AI tools to assist in medical English writing", would you be willing to take it? [Single-choice question]

| **Options** |  |
| --- | --- |
| A. Very willing |  |
| B. Willing |  |
| C. Average |  |
| D. Not interested |  |

20. What topics would you like to cover in the AI writing course? [Multiple Choice Question]

| **Options** |  |
| --- | --- |
| A. How to Write an Initial Draft Using AI |  |
| B. How to Revise Language with AI |  |
| C. How to Enhance One's Writing Skills with AI Assistance |  |
| D. Application of AI Tools in Different Journal Writing Styles |  |
| E. Boundaries and Usage Regulations of AI and Academic Integrity |  |
| F. Others (please specify): |  |

21.Did the following situations occur during the process of writing an English paper? [Multiple Choice Question]

| **Options** |  |
| --- | --- |
| A. Delaying writing or repeatedly revising |  |
| B. Being reluctant to seek feedback actively |  |
| C. Giving up submitting to SCI and switching to Chinese journals |  |
| D. Feeling anxious and affecting sleep |  |
| E. None of the above situations apply |  |

22. Have you actively sought emotional regulation? [Single-choice question]

| **Options** |  |
| --- | --- |
| A. Yes, I try to regulate myself or seek support. |  |
| B. No, I can only endure the discomfort. |  |
| C. Others |  |

23. What methods can help alleviate the anxiety associated with writing in English? [Multiple Choice Question]

| **Options** |  |
| --- | --- |
| A. Systematic writing courses/training |  |
| B. Timely encouragement and feedback from mentors |  |
| C. Assistance from AI writing tools |  |
| D. Peer collaboration in writing/workshops |  |
| E. Counseling or stress management |  |
| F. Others |  |

24. Did you receive English writing guidance from your tutor? [Single-choice question]

| **Options** |  |
| --- | --- |
| A. Frequently obtain |  |
| B. Occasionally obtain |  |
| C. Rarely obtain |  |
| D. Almost never obtain |  |

25. How does the supervisor guide students in writing English? [Multiple Choice Question]

| **Options** |  |
| --- | --- |
| A. Face-to-face guidance |  |
| B. Handwritten comments |  |
| C. Email feedback |  |
| D. Only assigning tasks without guidance |  |
| E. Others |  |

26. The emotions brought about by the mentor's feedback? [Multiple Choice Question]

| **Options** |  |
| --- | --- |
| A. Helpful, Encouraged |  |
| B. Too strict, Feeling stressed |  |
| C. Feeling lack of support |  |
| D. Confidence in writing has increased |  |
| E. Significant emotional fluctuations |  |

27. What kind of assistance do you expect your mentor to provide? [Multiple Choice Question]

| **Options** |  |
| --- | --- |
| A. Explain the writing ideas and structure |  |
| B. Provide templates or sample essays |  |
| C. Recommend writing tools/resources |  |
| D. Offer encouragement and psychological support |  |
| E. Share submission experiences |  |
| F. Provide one-on-one feedback |  |
| G. Others |  |
